# Supplementary material for: Mechanism of [CO2] Enrichment Alleviated Drought Stress in the Roots of Cucumber Seedlings Revealed via Proteomic and Biochemical Analysis
Source: MDPI journal article supplement (doi:10.3390/ijms232314911), 2022-11-28
Supplement: s1 [file s1]

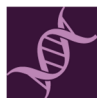

Article: Supplementary materials

# Mechanism of [CO<sub>2</sub>] Enrichment Alleviated Drought Stress in the Roots of Cucumber Seedlings Revealed via Proteomic and Biochemical Analysis

Yiman Li <sup>1,†</sup>, Wendong Zhang <sup>2,†</sup>, Dalong Zhang <sup>1,3</sup>, Yinjian Zheng <sup>4</sup>, Yaliang Xu <sup>4</sup>, Binbin Liu <sup>3,\*</sup> and Qingming Li <sup>4,\*</sup>

<sup>1</sup> College of Horticulture Science and Engineering, Shandong Agricultural University, Tai'an 271018, China

<sup>2</sup> College of Water Resource and Civil Engineering, China Agricultural University, Beijing 100083, China

<sup>3</sup> State Key Laboratory of Crop Biology, Tai'an 271018, China

<sup>4</sup> Institute of Urban Agriculture, Chinese Academy of Agricultural Sciences, Chengdu 610299, China

\* Correspondence: klab@sdaa.edu.cn (B.L.); liqingming@caas.cn (Q.L.)

† These authors contributed equally to this work.

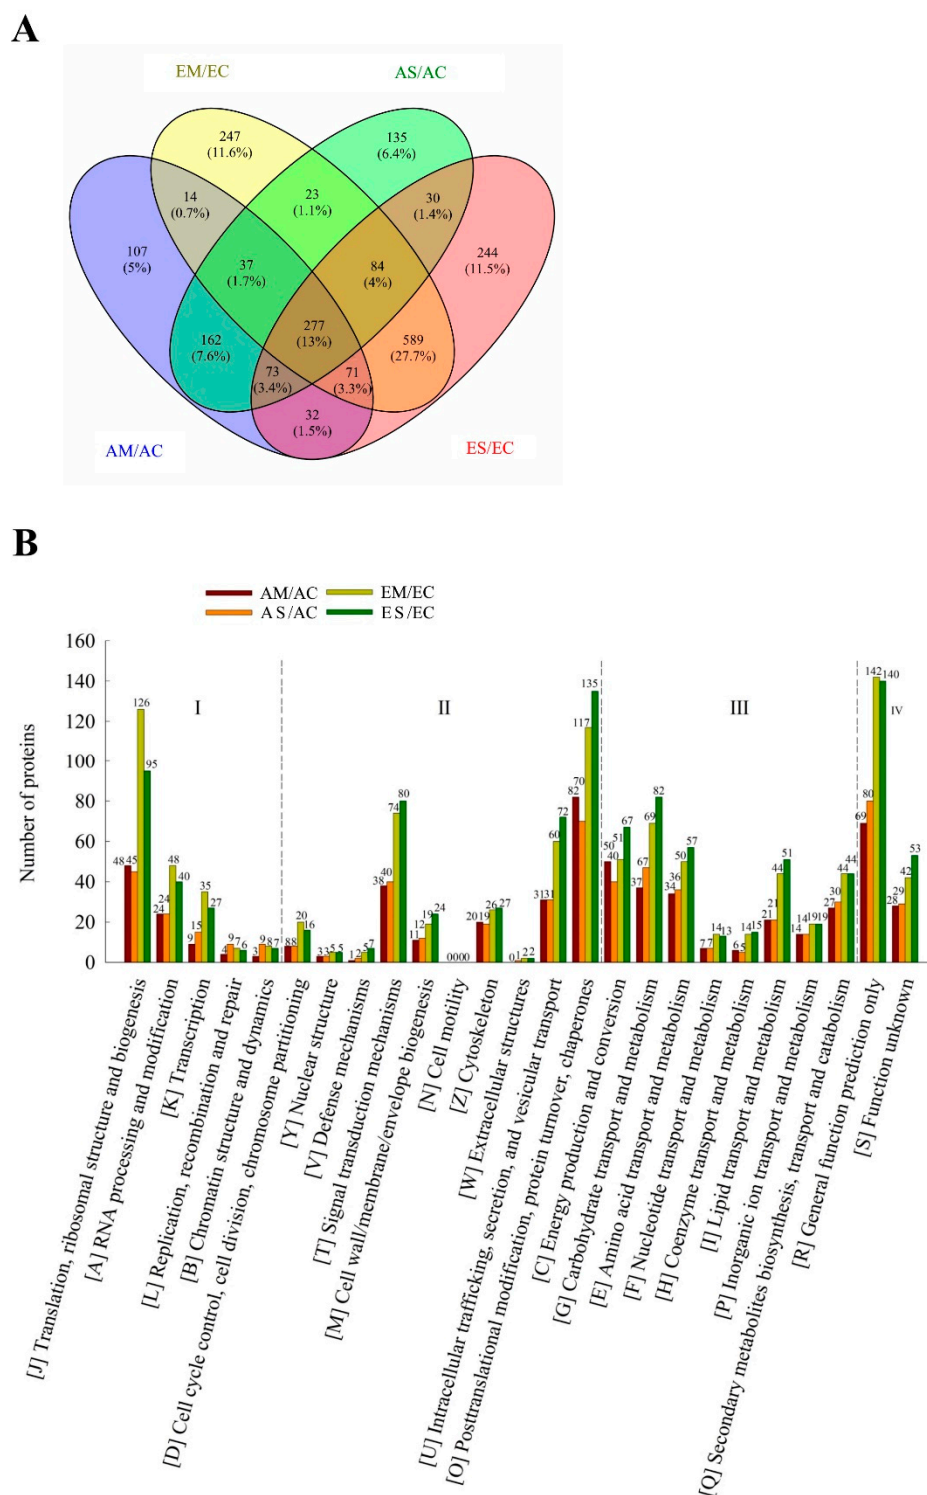

**Figure S1.** The differential proteins under moderate and severe drought stress. (A) Venn diagram analysis, (B) KOG functional classification chart ((I) Information storage and processing, (II) Cellular processes and signals, (III) Metabolism, (IV) other unknown functions). AC, atmospheric  $[\text{CO}_2]$  + control condition; EC,  $[\text{CO}_2]$  enrichment + control condition; AM, atmospheric  $[\text{CO}_2]$  + moderate drought stress; EM,  $[\text{CO}_2]$  enrichment + moderate drought stress; AS, atmospheric  $[\text{CO}_2]$  + severe drought stress; ES,  $[\text{CO}_2]$  enrichment + severe drought stress. The same below.

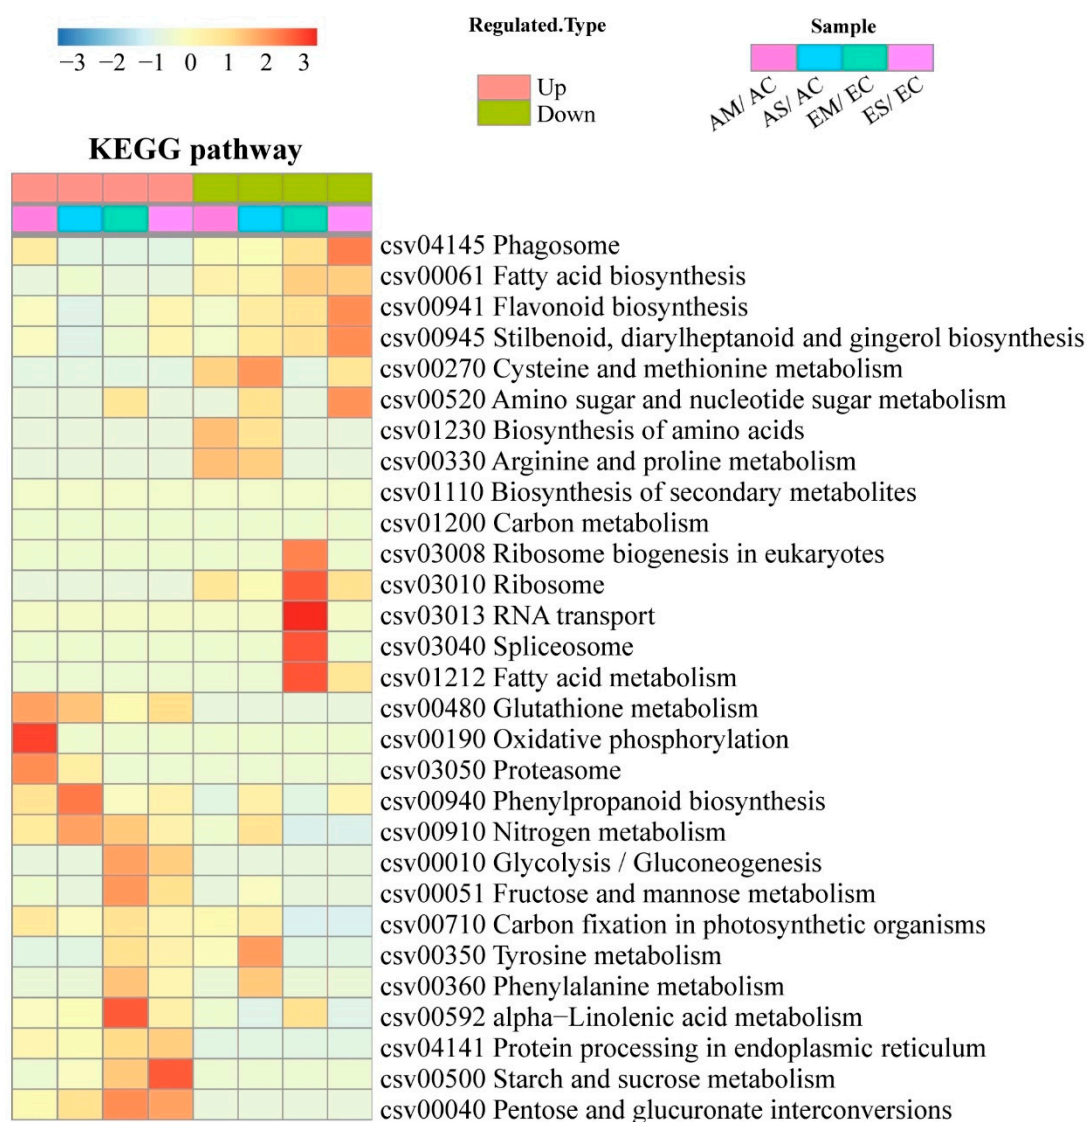

**Figure S2.** A comprehensive heatmap for cluster analysis of the enrichment patterns of KEGG pathways of differential proteins under moderate and severe drought stress. The color blocks corresponding to the functional description of the differentially expressed proteins in different groups indicate the degree of enrichment, red represents strong enrichment, and blue represents weak enrichment

Table S8. Effects of [CO<sub>2</sub>] enrichment on the activities of related enzymes in roots of cucumber seedlings under drought stress.

| Treatments         | Hexokinase<br>/nmol·min <sup>-1</sup> ·g <sup>-1</sup> FW | Alcohol<br>dehydrogenase<br>/μmol·min <sup>-1</sup> ·g <sup>-1</sup> FW | Malate<br>dehydrogenase<br>/mmol·min <sup>-1</sup> ·g <sup>-1</sup> FW | Nitrate<br>reductase<br>/ugNO <sub>2</sub> <sup>-</sup> ·g <sup>-1</sup> ·h <sup>-1</sup> FW | Glutamate<br>synthase<br>/U·g <sup>-1</sup> FW | Glutamate<br>dehydrogenase<br>/U·g <sup>-1</sup> FW |
|--------------------|-----------------------------------------------------------|-------------------------------------------------------------------------|------------------------------------------------------------------------|----------------------------------------------------------------------------------------------|------------------------------------------------|-----------------------------------------------------|
| AC                 | 3.78±0.22a                                                | 0.10±0.00c                                                              | 1.35±0.02b                                                             | 10.16±0.26b                                                                                  | 0.13±0.01b                                     | 0.661±0.016b                                        |
| EC                 | 4.01±0.22a                                                | 0.13±0.02bc                                                             | 1.61±0.28a                                                             | 11.60±1.03a                                                                                  | 0.20±0.02a                                     | 0.743±0.032a                                        |
| AM                 | 2.45±0.39b                                                | 0.17±0.04b                                                              | 0.86±0.03c                                                             | 8.10±0.50c                                                                                   | 0.08±0.01cd                                    | 0.484±0.033c                                        |
| EM                 | 2.97±0.34b                                                | 0.19±0.07b                                                              | 1.14±0.11b                                                             | 9.81±0.20b                                                                                   | 0.12±0.01bc                                    | 0.335±0.037d                                        |
| AS                 | 2.45±0.22b                                                | 0.19±0.01b                                                              | 0.53±0.09d                                                             | 6.97±0.15d                                                                                   | 0.03±0.01d                                     | 0.343±0.037d                                        |
| ES                 | 2.67±0.22b                                                | 0.32±0.03a                                                              | 0.71±0.06cd                                                            | 6.84±0.33d                                                                                   | 0.05±0.01d                                     | 0.196±0.054e                                        |
| p-value            |                                                           |                                                                         |                                                                        |                                                                                              |                                                |                                                     |
| [CO <sub>2</sub> ] | 0.030*                                                    | 0.007***                                                                | 0.002**                                                                | 0.001***                                                                                     | 0.000***                                       | 0.001***                                            |
| Drought            | 0.000***                                                  | 0.000***                                                                | 0.000***                                                               | 0.000***                                                                                     | 0.000***                                       | 0.000***                                            |
| Interaction        | 0.579 <sup>ns</sup>                                       | 0.047*                                                                  | 0.775 <sup>ns</sup>                                                    | 0.017*                                                                                       | 0.009***                                       | 0.000***                                            |

Note: Different letters within a column indicate a significant difference ( $p < 0.05$ ). AC, atmospheric [CO<sub>2</sub>] + control condition; EC, [CO<sub>2</sub>] enrichment + control condition; AM, atmospheric [CO<sub>2</sub>] + moderate drought stress; EM, [CO<sub>2</sub>] enrichment + moderate drought stress; AS, atmospheric [CO<sub>2</sub>] + severe drought stress; ES, [CO<sub>2</sub>] enrichment + severe drought stress. All results were expressed as the mean ± standard deviation (SD) of three repeated values, \*, difference is significant at the 0.05 level; \*\*, difference is significant at the 0.01 level; \*\*\*, difference is significant at the 0.001 level. The same as below.

Table S9. Effects of [CO<sub>2</sub>] enrichment on the contents of non-structural carbohydrates in roots of cucumber seedlings under drought stress.

| Treatments         | Starch<br>/mg·g <sup>-1</sup> DW | Total sugar<br>/mg·g <sup>-1</sup> DW | Sucrose<br>/mg·g <sup>-1</sup> DW | Reducing<br>sugar<br>/mg·g <sup>-1</sup> DW | Glucose<br>/mg·g <sup>-1</sup> DW | Fructose<br>/mg·g <sup>-1</sup> DW | Raffinose<br>/mg·g <sup>-1</sup> FW | Stachyose<br>/mg·g <sup>-1</sup> FW |
|--------------------|----------------------------------|---------------------------------------|-----------------------------------|---------------------------------------------|-----------------------------------|------------------------------------|-------------------------------------|-------------------------------------|
| AC                 | 280.05±14.97b                    | 138.05±23.94b                         | 21.81±1.99e                       | 65.05±1.25c                                 | 1.65±0.09c                        | 8.53±0.56de                        | 1.26±0.04e                          | 1.39±0.03e                          |
| EC                 | 324.68±11.89a                    | 143.89±13.62b                         | 24.43±1.54de                      | 69.02±1.24bc                                | 1.93±0.08b                        | 9.06±0.17d                         | 1.33±0.02de                         | 1.42±0.02de                         |
| AM                 | 211.14±20.46cd                   | 182.40±22.10ab                        | 26.77±1.85cd                      | 72.80±2.71bc                                | 1.96±0.05b                        | 9.63±0.34cd                        | 1.45±0.03c                          | 1.46±0.02d                          |
| EM                 | 246.50±6.96bc                    | 203.44±46.05a                         | 28.46±1.88c                       | 76.43±6.74b                                 | 2.13±0.05a                        | 10.55±0.05c                        | 1.42±0.03cd                         | 1.68±0.02a                          |
| AS                 | 154.41±21.99e                    | 218.13±29.35a                         | 36.62±2.92b                       | 92.89±5.02a                                 | 2.19±0.12a                        | 13.71±0.22b                        | 2.56±0.11b                          | 1.61±0.03b                          |
| ES                 | 186.81±33.10de                   | 222.82±32.57a                         | 47.18±2.18a                       | 94.58±6.67a                                 | 2.25±0.08a                        | 18.68±1.79a                        | 2.80±0.09a                          | 1.54±0.05c                          |
| p-value            |                                  |                                       |                                   |                                             |                                   |                                    |                                     |                                     |
| [CO <sub>2</sub> ] | 0.002***                         | 0.467*                                | 0.000***                          | 0.176 <sup>ns</sup>                         | 0.001***                          | 0.000***                           | 0.008***                            | 0.001***                            |
| Drought            | 0.000***                         | 0.002***                              | 0.000***                          | 0.000***                                    | 0.000***                          | 0.000***                           | 0.000***                            | 0.000***                            |
| Interaction        | 0.861 <sup>ns</sup>              | 0.869 <sup>ns</sup>                   | 0.006***                          | 0.898 <sup>ns</sup>                         | 0.107 <sup>ns</sup>               | 0.001***                           | 0.010*                              | 0.000***                            |

**Table S10.** Effects of [CO<sub>2</sub>] enrichment on the contents of metabolism related compounds in roots of cucumber seedlings under drought stress.

| Treatments         | Total nitrogen /%   | NH <sub>4</sub> <sup>+</sup> -N / $\mu\text{g}\cdot\text{g}^{-1}\text{FW}$ | NO <sub>3</sub> <sup>-</sup> -N / $\mu\text{g}\cdot\text{g}^{-1}\text{FW}$ | Free amino acids / $\text{mg}\cdot\text{g}^{-1}\text{FW}$ | Pyruvic acid / $\mu\text{g}\cdot\text{g}^{-1}\text{FW}$ | Citric acid / $\mu\text{mol}\cdot\text{g}^{-1}\text{FW}$ | Total phenols / $\text{mg}\cdot\text{g}^{-1}\text{DW}$ | Flavonoid / $\text{mg}\cdot\text{g}^{-1}\text{DW}$ |
|--------------------|---------------------|----------------------------------------------------------------------------|----------------------------------------------------------------------------|-----------------------------------------------------------|---------------------------------------------------------|----------------------------------------------------------|--------------------------------------------------------|----------------------------------------------------|
| AC                 | 3.15±0.07a          | 16.76±0.76e                                                                | 430.56±4.37a                                                               | 0.050±0.005a                                              | 17.08±3.05b                                             | 28.54±1.30c                                              | 1.99±0.17ab                                            | 2.32±0.16b                                         |
| EC                 | 3.18±0.07a          | 20.32±0.88d                                                                | 412.25±25.85a                                                              | 0.054±0.011a                                              | 28.49±3.62a                                             | 25.63±1.65c                                              | 1.47±0.43c                                             | 2.29±0.01b                                         |
| AM                 | 2.41±0.07c          | 35.81±1.52a                                                                | 233.59±33.36bc                                                             | 0.043±0.001a                                              | 10.46±1.24c                                             | 46.25±1.08b                                              | 1.84±0.14abc                                           | 2.52±0.10ab                                        |
| EM                 | 2.66±0.21b          | 25.90±1.52c                                                                | 264.52±17.60b                                                              | 0.048±0.004a                                              | 16.83±2.68b                                             | 43.96±3.66b                                              | 2.25±0.20a                                             | 2.62±0.05a                                         |
| AS                 | 1.77±0.12d          | 30.22±1.16b                                                                | 206.44±11.52c                                                              | 0.040±0.004a                                              | 7.71±1.87c                                              | 53.13±1.25a                                              | 1.66±0.04bc                                            | 1.92±0.17c                                         |
| ES                 | 1.93±0.11d          | 29.21±1.59b                                                                | 259.47±6.83b                                                               | 0.044±0.001a                                              | 9.89±1.99c                                              | 52.71±1.57a                                              | 1.73±0.12bc                                            | 2.04±0.17c                                         |
| p-value            |                     |                                                                            |                                                                            |                                                           |                                                         |                                                          |                                                        |                                                    |
| [CO <sub>2</sub> ] | 0.022*              | 0.002***                                                                   | 0.035*                                                                     | 0.130 <sup>ns</sup>                                       | 0.000***                                                | 0.065 <sup>ns</sup>                                      | 0.885 <sup>ns</sup>                                    | 0.314 <sup>ns</sup>                                |
| Drought            | 0.000***            | 0.000***                                                                   | 0.000***                                                                   | 0.021*                                                    | 0.000***                                                | 0.000***                                                 | 0.032*                                                 | 0.000***                                           |
| Interaction        | 0.333 <sup>ns</sup> | 0.000***                                                                   | 0.023*                                                                     | 0.990 <sup>ns</sup>                                       | 0.027*                                                  | 0.534 <sup>ns</sup>                                      | 0.011*                                                 | 0.535 <sup>ns</sup>                                |
